# Supplementary material for: B cell infiltration is highly associated with prognosis and an immune-infiltrated tumor microenvironment in neuroblastoma
Source: PubMed Central journal article supplement (PMC8389852; doi:10.20517/2394-4722.2021.72), 2021-06-06
Supplement: NIHMS1719673-supplement-Supplementary_Meterial.pdf [file NIHMS1719673-supplement-Supplementary_Meterial.pdf]

## Supplementary Figures

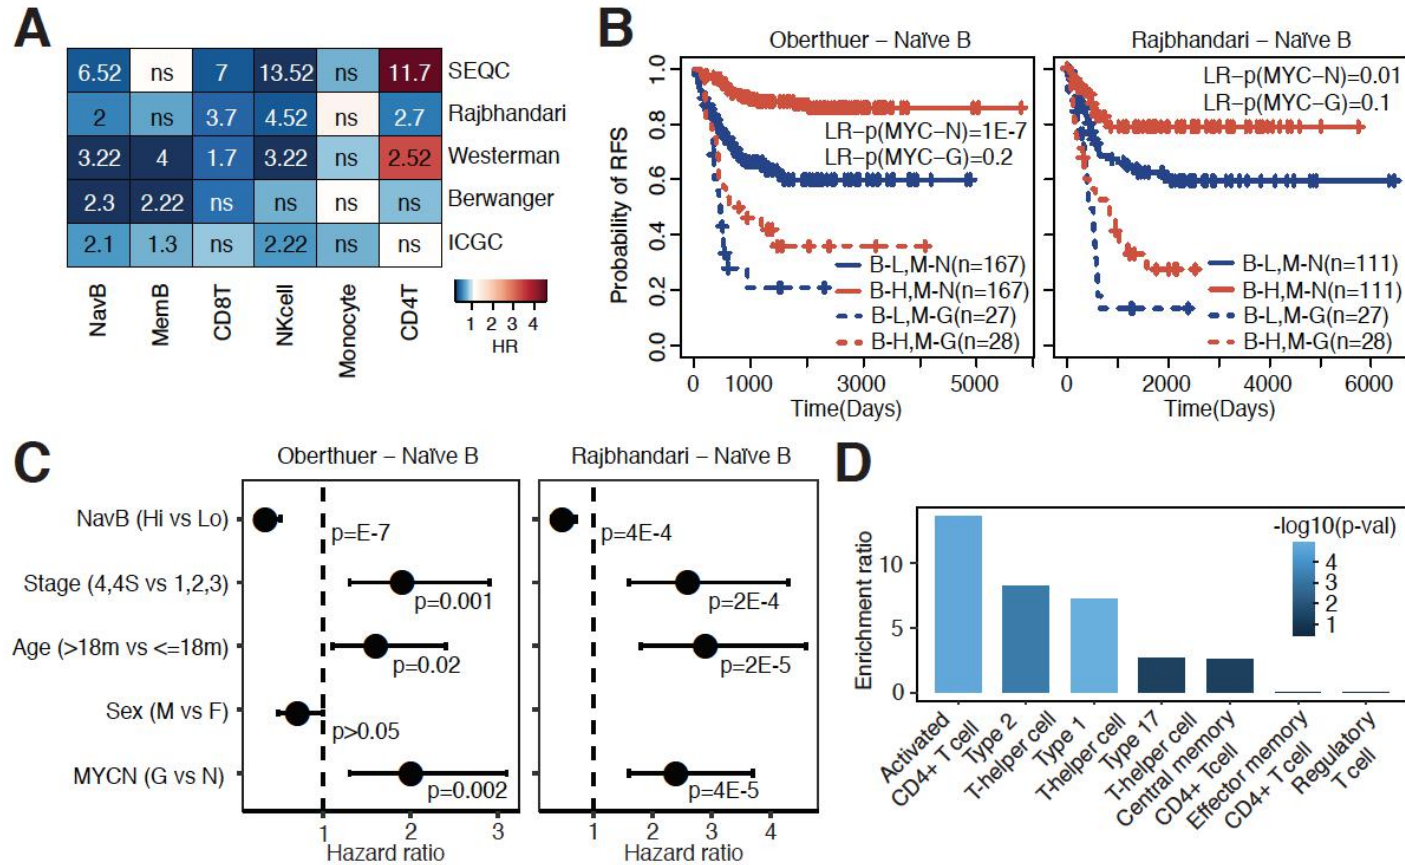

**Suppl. Figure 1. Association between immune cell infiltration levels and prognosis in neuroblastoma.** **A.** Heatmap depicting  $-\log_{10}(\text{p-values})$  of log-rank tests for 5 datasets and 6 immune cell types. Color indicates magnitude of hazard ratios. **B.** KM plots showing the association between high and low levels of naïve B cell infiltration and recurrence-free survival stratified based on MYC amplification status in the Oberthuer and Rajbhandari datasets. B-L = naïve B-low, B-H = naïve B-high, M-N = MYCN-Normal, M-G = MYCN-Gain. LR-p(MYC-N) = p-value calculated by Log-rank tests comparing low and high naïve B infiltration within patients with MYCN-normal status. LR-p(MYC-G) = p-value calculated by Log-rank tests comparing low and high naïve B infiltration within patients with MYCN-Gain status. **C.** Forest plots showing the association between naïve B cell infiltration and recurrence-free survival in the Oberthuer and Rajbhandari datasets using multivariate Coxph regression models adjusted for stage, age (>18 months vs. <=18 months), sex (male vs. female), and MYCN amplification status (MYC-Gain vs. MYC-Normal). **D.** Enrichment of CD4+ T cell subset marker genes in the inferred CD4+ T cell signature. P-value calculated using hypergeometric tests. CD4+ T cell marker genes obtained from [34].

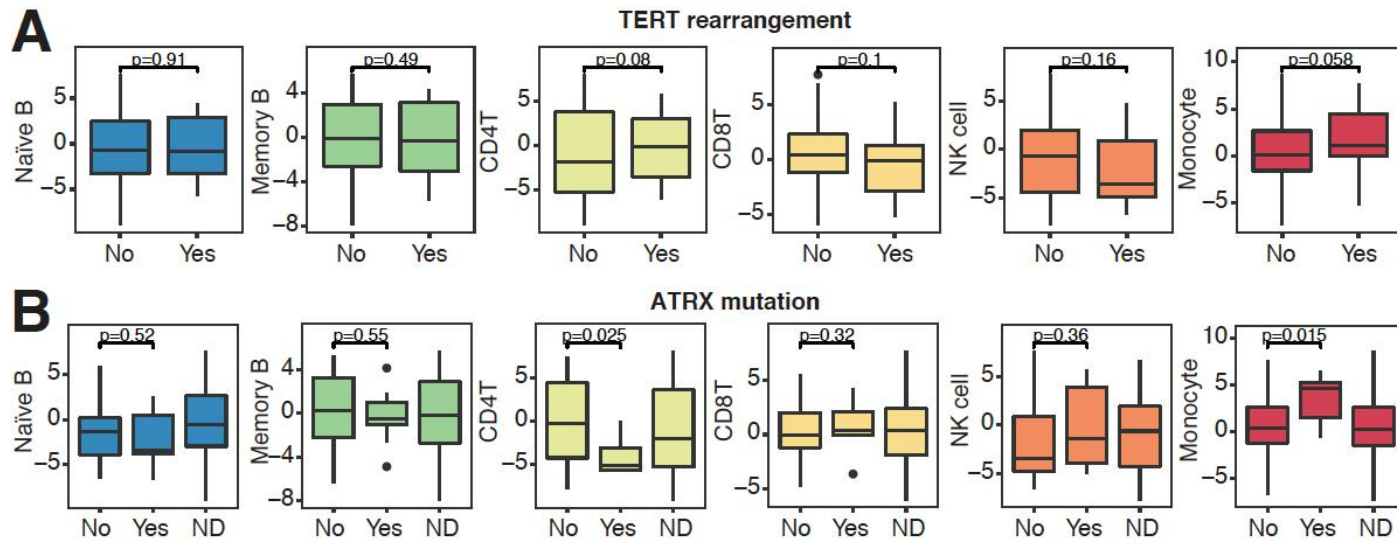

**Suppl. Figure 2. Association between TERT rearrangements or ATRX mutations and immune cell infiltration in neuroblastoma. A.** Comparison of immune cell infiltration in patients with or without TERT rearrangements in the Ackermann dataset. **B.** Comparison of immune cell infiltration in patients with or without ATRX mutations in the Ackermann dataset. Significance calculated using Wilcoxon rank-sum tests. ND = no data.

## Supplementary Tables

**Supplementary Table 1.** Overview of datasets utilized in this study

| First Author/<br>Consortium | PMID     | GEO       | EMBL       | N   | Matching clinical<br>data | Overall<br>survival | Recurrence free<br>survival | Age                | Stage | Grade | Sex | NMYC<br>copy | Chr 1p | Chr 11q | Chr 17q | TERT | ATRX | Platform   |
|-----------------------------|----------|-----------|------------|-----|---------------------------|---------------------|-----------------------------|--------------------|-------|-------|-----|--------------|--------|---------|---------|------|------|------------|
| Berwanger                   | 12450793 | N/A       | N/A        | 94  | 94                        | Yes                 | No                          | No                 | No    | No    | No  | No           | No     | No      | No      | No   | No   | Microarray |
| Westerman                   | 18851746 | N/A       | E-TABM-38  | 251 | 198                       | Yes                 | Yes                         | Yes                | Yes   | No    | Yes | Yes          | No     | No      | No      | No   | No   | Microarray |
| Henrich                     | 27635046 | GSE73517  | N/A        | 105 | 105                       | No                  | No                          | Yes (<1.5y, >1.5y) | Yes   | No    | No  | Yes          | Yes    | Yes     | Yes     | No   | No   | Microarray |
| Oberthuer                   | 20676065 | N/A       | E-MTAB-179 | 478 | 478                       | Yes                 | Yes                         | Yes                | Yes   | No    | Yes | Yes          | Yes    | No      | No      | No   | No   | Microarray |
| ICGC<br>(TARGET)            | 23334666 | N/A       | N/A        | 249 | 249                       | Yes                 | No                          | Yes                | Yes   | Yes   | Yes | No           | No     | No      | No      | No   | No   | RNA-seq    |
| SEQC                        | 25254650 | GSE62564  | N/A        | 498 | 498                       | Yes                 | Yes                         | Yes                | No    | No    | No  | No           | No     | No      | No      | No   | No   | RNA-seq    |
| Kocak                       | 24737690 | GSE45547  | N/A        | 649 | 649                       | No                  | No                          | Yes (<18m, >18m)   | Yes   | No    | Yes | Yes          | No     | No      | No      | No   | No   | Microarray |
| Wang                        | 16778177 | GSE3960   | N/A        | 102 | 102                       | No                  | No                          | Yes                | Yes   | No    | No  | Yes          | Yes    | Yes     | Yes     | No   | No   | Microarray |
| Rajbhandari                 | 29510988 | GSE85047  | N/A        | 283 | 283                       | Yes                 | Yes                         | Yes                | Yes   | No    | No  | Yes          | No     | No      | No      | No   | No   | Microarray |
| Lastowska                   | 17533364 | GSE13136  | N/A        | 30  | 30                        | No                  | No                          | Yes                | Yes   | No    | Yes | Yes          | Yes    | Yes     | Yes     | No   | No   | Microarray |
| Ackermann                   | 30523111 | GSE120572 | N/A        | 394 | 394                       | No                  | No                          | Yes                | Yes   | No    | No  | Yes          | No     | No      | No      | Yes  | Yes  | Microarray |
